# Supplementary material for: Stable Carbenes as Structural Components of Partially Saturated Sulfur-Containing Heterocycles
Source: MDPI journal article supplement (doi:10.3390/molecules27051458), 2022-02-22
Supplement: s1 [file s1]

# Stable carbenes as structural components of partially saturated sulfur-containing heterocycles

A.B. Rozhenko,<sup>1,2</sup> Yu.S. Horbenko,<sup>1,2</sup> A.A. Kyrylchuk,<sup>1</sup>  
E.V. Zarudnitskii,<sup>1,2</sup> S.S. Mykhaylychenko,<sup>1</sup> Yu.G. Shermolovich,<sup>1</sup>  
A.V. Grafov<sup>3,\*</sup>

<sup>1</sup> *Institute of Organic Chemistry, National Academy of Sciences, Murmanska str. 5, Kyiv, 02094, Ukraine*

<sup>2</sup> *National Technical University of Ukraine "Igor Sikorsky Kyiv Polytechnic Institute", Prosp. Peremohy 37, Kyiv, 03056, Ukraine*

<sup>3</sup> *Department of chemistry, University of Helsinki, A.I.Virtasen aukio 1, 00560 Helsinki, Finland*

\* Correspondence: [andriy.grafov@helsinki.fi](mailto:andriy.grafov@helsinki.fi)

## Electronic Supplementary Information

### Content:

|                                                                                                                                                                                                                                                                                          | page |
|------------------------------------------------------------------------------------------------------------------------------------------------------------------------------------------------------------------------------------------------------------------------------------------|------|
| Table S1. Total energy values (E), zero-point energy correction (ZPE) and thermal correction to enthalpy (TCE) and Gibbs free energy (TCGFE), corrected energy values (E+ZPE, E+TCE and E+TCGFE, a.u.), the lowest vibration frequency for compounds of <b>1-8</b> (RI-SCS-MP2/cc-pVTZ). | S2   |
| Figure S1. Model linear structures <b>9</b> and <b>10</b> .                                                                                                                                                                                                                              | S5   |
| Figure S2. Dependence of C-S bond lengths in model compounds <b>9a-g</b> , <b>10a-o</b> (a), <b>9a-g</b> (b) and <b>10a-o</b> (c). Linear approximations and coefficients of determination are indicated for each plot.                                                                  | S6   |
| Table S2. Bond lengths and total NBO charges on carbene moieties for compounds <b>9a-g</b> , <b>10a-o</b> .                                                                                                                                                                              | S7   |
| Cartesian coordinates for the equilibrium structures <b>1-6</b> (SCS-MP2/cc-pVTZ) for compounds of <b>1-8</b> (RI-SCS-MP2/cc-pVTZ).                                                                                                                                                      | S8   |

Table S1. Total energy values (E), zero-point energy correction (ZPE) and thermal correction to enthalpy (TCE) and Gibbs free energy (TCGFE), corrected energy values (E+ZPE, E+TCE and E+TCGFE, a.u.), the lowest vibration frequency for compounds of **1-8** (RI-SCS-MP2/cc-pVTZ).

| Struc-<br>ture | Energy, a.u. | ZPE, a.u. | E+ZPE, a.u.  | TCE<br>a.u. | E+ TCE,<br>a.u. | TCGFE<br>a.u. | E+ TCGFE,<br>a.u. | $\nu$ , cm <sup>-1</sup> |
|----------------|--------------|-----------|--------------|-------------|-----------------|---------------|-------------------|--------------------------|
| <b>1a</b>      | -990.313249  | 0.119186  | -990.194063  | 0.122179    | -990.191070     | 0.081135      | -990.232114       | 118.3                    |
| <b>1b</b>      | -1084.769533 | 0.164850  | -1084.604683 | 0.174061    | -1084.595472    | 0.121474      | -1084.648059      | 94.0                     |
| <b>1c</b>      | -1179.228448 | 0.209825  | -1179.018623 | 0.213742    | -1179.014706    | 0.160149      | -1179.068299      | 124.6                    |
| <b>1d</b>      | -1382.140199 | 0.141429  | -1381.998770 | 0.147949    | -1381.992250    | 0.095826      | -1382.044373      | 66.6                     |
| <b>1e</b>      | -911.857324  | 0.062894  | -911.794431  | 0.065805    | -911.791520     | 0.030767      | -911.826557       | 158.6                    |
| <b>1f</b>      | -1830.060018 | 0.043081  | -1830.016936 | 0.049366    | -1830.010652    | 0.007770      | -1830.052248      | 92.6                     |
| <b>1g</b>      | -1110.095875 | 0.046403  | -1110.049472 | 0.051735    | -1110.044140    | 0.011872      | -1110.084003      | 34.7                     |
| <b>1h</b>      | -1289.740930 | 0.244792  | -1289.496138 | 0.249838    | -1289.491092    | 0.190585      | -1289.550345      | 44.3                     |
| <b>1i</b>      | -1587.582369 | 0.215216  | -1587.367152 | 0.224437    | -1587.357931    | 0.156580      | -1587.425789      | 25.7                     |
| <b>1j</b>      | -1377.440115 | 0.194344  | -1377.245770 | 0.200903    | -1377.239212    | 0.142879      | -1377.297235      | 32.8                     |
| <b>1k</b>      | -1234.483540 | 0.227065  | -1234.256475 | 0.231602    | -1234.251939    | 0.175296      | -1234.308244      | 52.4                     |
| <b>1l</b>      | -1383.413668 | 0.212780  | -1383.200888 | 0.219223    | -1383.194444    | 0.158636      | -1383.255031      | 22.8                     |
| <b>1m</b>      | -1278.337537 | 0.202117  | -1278.135420 | 0.207267    | -1278.130270    | 0.151838      | -1278.185699      | 41.4                     |
| <b>2a</b>      | -742.307593  | 0.180813  | -742.126780  | 0.182895    | -742.124698     | 0.137368      | -742.170224       | 91.3                     |
| <b>2b</b>      | -836.767447  | 0.226033  | -836.541415  | 0.228589    | -836.538858     | 0.176942      | -836.590506       | 80.9                     |
| <b>2c</b>      | -875.980001  | 0.253755  | -875.726245  | 0.256664    | -875.723337     | 0.201470      | -875.778530       | 82.8                     |

Table S1. Continued.

| Structure  | Energy, a.u. | ZPE, a.u. | E+ZPE, a.u.  | TCE<br>a.u. | E+ TCE,<br>a.u. | TCGFE<br>a.u. | E+ TCGFE,<br>a.u. | $\nu$ , cm <sup>-1</sup> |
|------------|--------------|-----------|--------------|-------------|-----------------|---------------|-------------------|--------------------------|
| <b>3a</b>  | -856.624248  | 0.213283  | -856.410964  | 0.216412    | -856.407835     | 0.164574      | -856.459673       | 68.5                     |
| <b>3b</b>  | -895.856691  | 0.241323  | -895.615368  | 0.244765    | -895.611926     | 0.189092      | -895.667600       | 43.9                     |
| <b>4a</b>  | -663.864978  | 0.123226  | -663.741752  | 0.125462    | -663.739516     | 0.085896      | -663.779082       | 145.8                    |
| <b>4b</b>  | -758.326977  | 0.169261  | -758.157716  | 0.171647    | -758.155330     | 0.126624      | -758.200353       | 99.3                     |
| <b>4c</b>  | -852.784680  | 0.214228  | -852.570452  | 0.217166    | -852.567514     | 0.165934      | -852.618746       | 87.4                     |
| <b>4d</b>  | -1055.690500 | 0.145203  | -1055.545296 | 0.151202    | -1055.539298    | 0.098941      | -1055.591559      | 29.0                     |
| <b>4e</b>  | -703.081629  | 0.151224  | -702.930405  | 0.153533    | -702.928096     | 0.110790      | -702.970838       | 108.3                    |
| <b>4f</b>  | -797.543278  | 0.197128  | -797.346150  | 0.199695    | -797.343583     | 0.151426      | -797.391852       | 95.5                     |
| <b>4g</b>  | -891.999824  | 0.242159  | -891.757665  | 0.245325    | -891.754499     | 0.190893      | -891.808931       | 97.3                     |
| <b>4h</b>  | -1094.904191 | 0.173344  | -1094.730847 | 0.179356    | -1094.724835    | 0.124894      | -1094.779297      | 44.5                     |
| <b>5a</b>  | -719.091305  | 0.138546  | -718.952759  | 0.141600    | -718.949705     | 0.098412      | -718.992893       | 97.5                     |
| <b>5b</b>  | -813.554630  | 0.184587  | -813.370043  | 0.187858    | -813.366773     | 0.139124      | -813.415506       | 88.4                     |
| <b>5c</b>  | -908.010980  | 0.229795  | -907.781185  | 0.233563    | -907.777416     | 0.178899      | -907.832080       | 89.3                     |
| <b>6a</b>  | -834.357303  | 0.180147  | -834.177156  | 0.183546    | -834.173757     | 0.134633      | -834.222669       | 86.8                     |
| <b>6a'</b> | -873.574131  | 0.208151  | -873.365980  | 0.211735    | -873.362396     | 0.159463      | -873.414668       | 81.9                     |
| <b>6b</b>  | -850.377187  | 0.168747  | -850.208440  | 0.172531    | -850.204656     | 0.123820      | -850.253366       | 96.0                     |
| <b>6b'</b> | -889.595555  | 0.196531  | -889.399024  | 0.200488    | -889.395068     | 0.148574      | -889.446981       | 90.9                     |
| <b>6c</b>  | -905.602175  | 0.183915  | -905.418260  | 0.188383    | -905.413792     | 0.136492      | -905.465683       | 82.0                     |
| <b>6d</b>  | -854.208366  | 0.167219  | -854.041147  | 0.171335    | -854.037031     | 0.121032      | -854.087334       | 26.6                     |
| <b>6e</b>  | -1176.817020 | 0.163985  | -1176.653035 | 0.168974    | -1176.648046    | 0.117197      | -1176.699823      | 46.1                     |

Table S1. Continued.

| Structure | Energy, a.u. | ZPE, a.u. | E+ZPE, a.u.  | TCE<br>a.u. | E+ TCE,<br>a.u. | TCGFE<br>a.u. | E+ TCGFE,<br>a.u. | $\nu$ , cm <sup>-1</sup> |
|-----------|--------------|-----------|--------------|-------------|-----------------|---------------|-------------------|--------------------------|
| <b>7a</b> | -306.520371  | 0.172342  | -306.348028  | 0.174047    | -306.346324     | 0.130981      | -306.389390       | 75.9                     |
| <b>7b</b> | -509.423546  | 0.103449  | -509.320097  | 0.107960    | -509.315586     | 0.063314      | -509.360232       | 14.3                     |
| <b>7c</b> | -237.372399  | 0.007088  | -237.365311  | 0.010687    | -237.361711     | -0.016698     | -237.389096       | 681.4                    |
| <b>7d</b> | -304.147740  | 0.127768  | -304.019972  | 0.129587    | -304.018153     | 0.090745      | -304.056995       | 104.9                    |
| <b>7e</b> | -305.342896  | 0.151245  | -305.191651  | 0.152474    | -305.190422     | 0.111899      | -305.230997       | 116.0                    |
| <b>8a</b> | -835.575879  | 0.204950  | -835.370929  | 0.207039    | -835.368841     | 0.158259      | -835.417620       | 68.3                     |
| <b>8b</b> | -855.429068  | 0.192093  | -855.236975  | 0.194812    | -855.234256     | 0.145565      | -855.283504       | 54.0                     |
| <b>8c</b> | -1178.035416 | 0.188695  | -1177.846721 | 0.192184    | -1177.843231    | 0.141543      | -1177.893873      | 47.3                     |
| <b>8d</b> | -851.593795  | 0.193053  | -851.400742  | 0.195628    | -851.398167     | 0.146947      | -851.446848       | 69.8                     |
| <b>8e</b> | -890.811149  | 0.221129  | -890.590021  | 0.223809    | -890.587341     | 0.172146      | -890.639003       | 81.7                     |

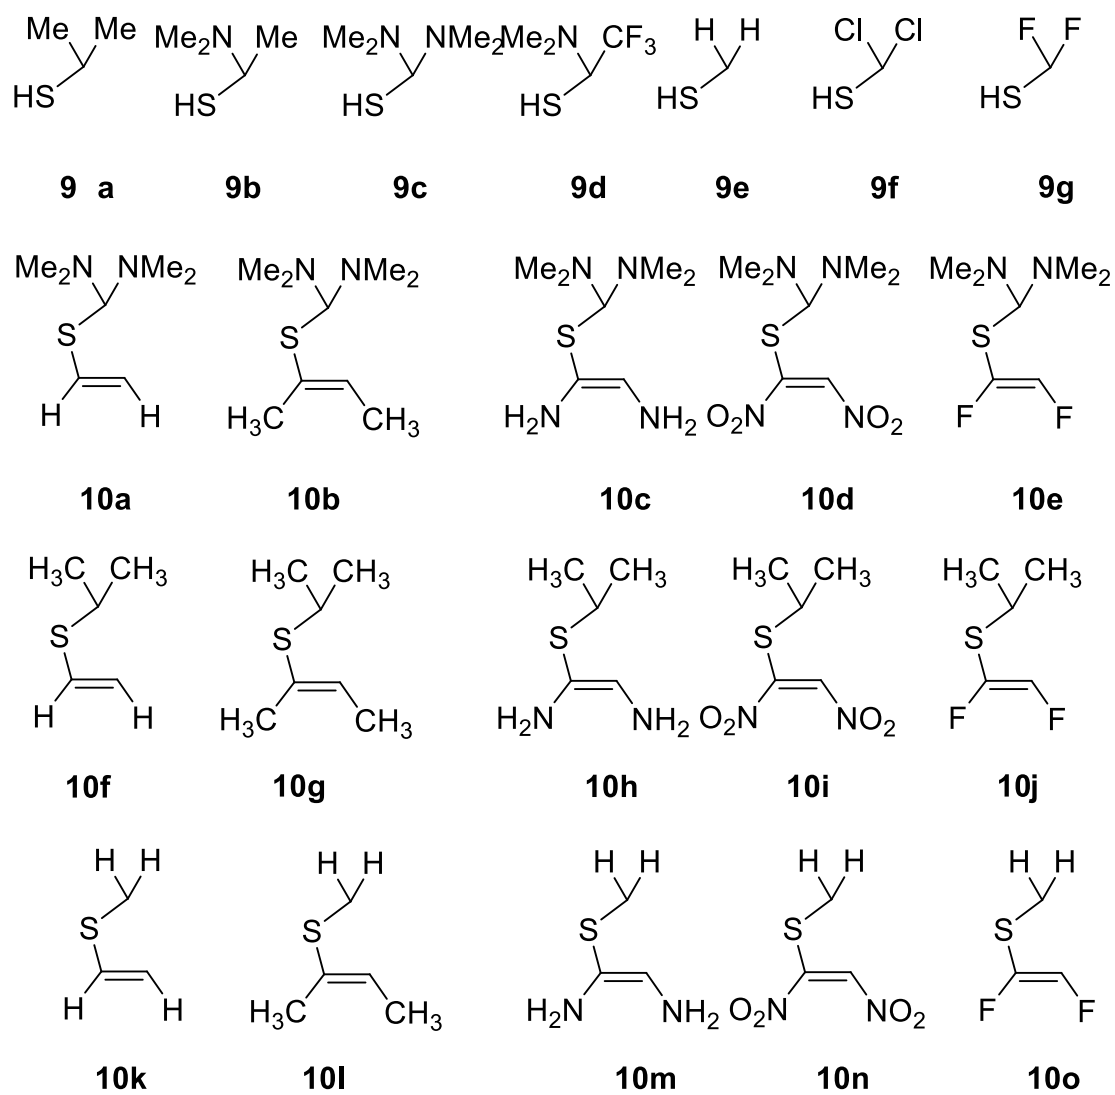

Figure S1. Model linear structures **9** and **10**.

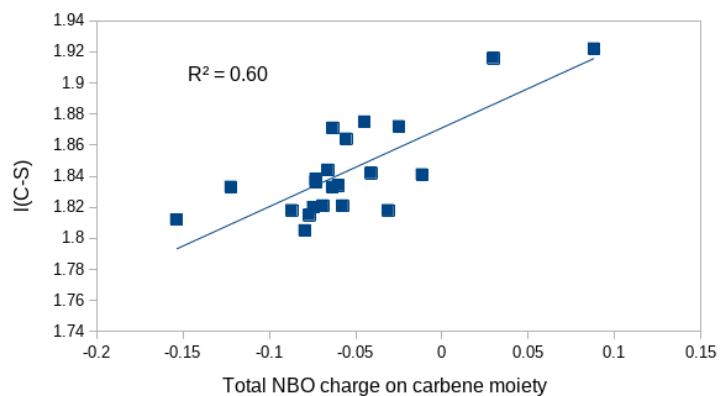

a

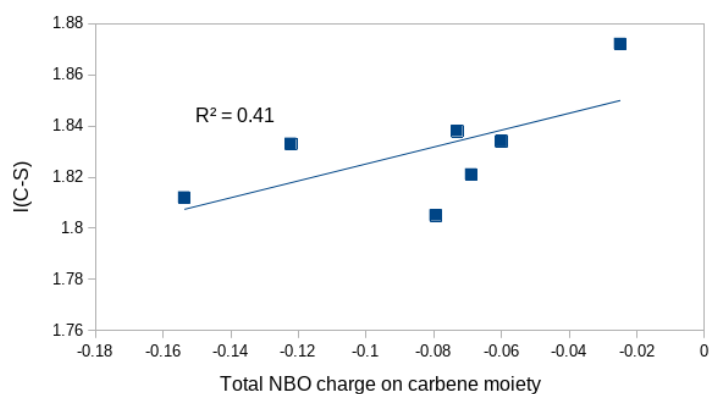

b

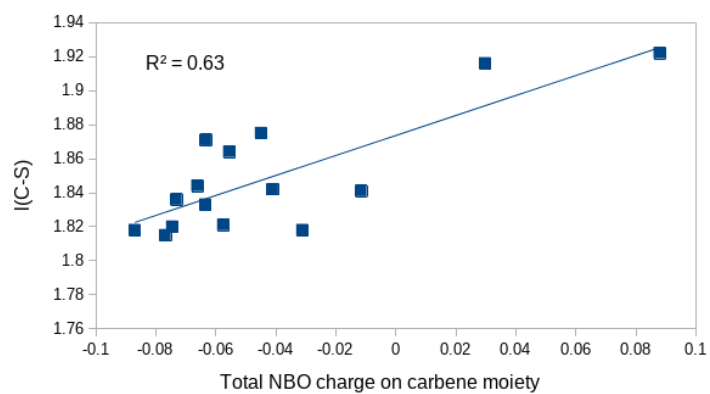

c

Figure S2. Dependence of C-S bond lengths in model compounds **9a-g**, **10a-o** (a), **9a-g** (b) and **10a-o** (c). Linear approximations and coefficients of determination are indicated for each plot.

Table S2. Bond lengths and total NBO charges on carbene moieties for compounds **9a-g**, **10a-o**.

| Compd.     | I(C-S) | Carbene charge |
|------------|--------|----------------|
| <b>9a</b>  | 1.834  | -0.06          |
| <b>9b</b>  | 1.838  | -0.0731        |
| <b>9c</b>  | 1.872  | -0.0249        |
| <b>9d</b>  | 1.833  | -0.1222        |
| <b>9e</b>  | 1.821  | -0.0689        |
| <b>9f</b>  | 1.812  | -0.1537        |
| <b>9g</b>  | 1.805  | -0.0794        |
| <b>10a</b> | 1.864  | -0.0555        |
| <b>10b</b> | 1.871  | -0.0633        |
| <b>10c</b> | 1.875  | -0.0449        |
| <b>10d</b> | 1.922  | 0.088          |
| <b>10e</b> | 1.916  | 0.0298         |
| <b>10f</b> | 1.833  | -0.0635        |
| <b>10g</b> | 1.836  | -0.0731        |
| <b>10h</b> | 1.844  | -0.0661        |
| <b>10i</b> | 1.841  | -0.0115        |
| <b>10j</b> | 1.842  | -0.041         |
| <b>10k</b> | 1.815  | -0.0768        |
| <b>10l</b> | 1.818  | -0.087         |
| <b>10m</b> | 1.82   | -0.0745        |
| <b>10n</b> | 1.818  | -0.0311        |
| <b>10o</b> | 1.821  | -0.0575        |

**Cartesian coordinates for the equilibrium structures 1-6 (SCS-MP2/cc-pVTZ) for compounds of 1-8 (RI-SCS-MP2/cc-pVTZ).**

|                              |                              |                              |
|------------------------------|------------------------------|------------------------------|
| <b>1a</b>                    | <b>1b</b>                    | <b>1c</b>                    |
| S -5.99520 0.10950 0.27843   | S -5.96252 -0.00793 0.32788  | S -1.35661 0.85915 -0.61958  |
| C -6.42564 -0.79476 -1.16612 | C -6.52577 -0.70156 -1.17950 | C -0.51988 0.99639 -2.14732  |
| C -5.55377 -0.77067 -2.18678 | C -5.68107 -0.71275 -2.22215 | C 0.73226 0.52411 -2.24845   |
| S -4.08112 0.16238 -1.96229  | S -4.10108 0.01128 -2.00258  | S 1.49483 -0.17598 -0.84131  |
| C -4.19693 0.14417 -0.12315  | C -4.16622 0.05144 -0.11756  | C -0.03712 -0.16603 0.26938  |
| C -3.52280 -1.11199 0.42308  | N -3.46845 -1.03439 0.52975  | N -0.55529 -1.49687 0.48994  |
| C -3.56540 1.41128 0.44623   | C -3.61134 1.40792 0.32745   | C 0.37061 -2.35157 1.24393   |
| H -7.37695 -1.30496 -1.19436 | H -7.52883 -1.10182 -1.20886 | C -0.97236 -2.19756 -0.72342 |
| H -5.71868 -1.25915 -3.13562 | H -5.92516 -1.12694 -3.18960 | N 0.32326 0.41275 1.54369    |
| H -2.46428 -1.10859 0.15707  | H -4.26660 2.19967 -0.02189  | C -0.79758 0.41697 2.49216   |
| H -3.98520 -2.00590 0.00699  | H -2.61804 1.58018 -0.08381  | C 0.89684 1.75682 1.48013    |
| H -3.61983 -1.14050 1.50981  | H -3.55188 1.43557 1.41624   | H -1.05005 1.45798 -2.96784  |
| H -4.05032 2.30188 0.05301   | C -2.01033 -0.95308 0.41647  | H 1.31202 0.56533 -3.15928   |
| H -2.50471 1.44161 0.19265   | C -3.91874 -2.36709 0.13385  | H 1.27940 -2.57329 0.66988   |
| H -3.65046 1.40996 1.53390   | H -1.62927 -0.06694 0.91514  | H 0.65513 -1.87661 2.17623   |
|                              | H -1.66824 -0.95609 -0.62729 | H -0.13847 -3.29035 1.45698  |
|                              | H -1.58688 -1.82326 0.91415  | H -0.12353 -2.42272 -1.38096 |
|                              | H -4.99200 -2.45218 0.27527  | H -1.43990 -3.13438 -0.42430 |
|                              | H -3.42729 -3.09734 0.77470  | H -1.70049 -1.60649 -1.26956 |
|                              | H -3.67542 -2.59445 -0.91147 | H -1.22588 -0.57499 2.58107  |
|                              |                              | H -1.58751 1.11472 2.18283   |
|                              |                              | H -0.41963 0.73782 3.46168   |
|                              |                              | H 1.77079 1.76885 0.83777    |
|                              |                              | H 0.17559 2.49580 1.11044    |
|                              |                              | H 1.19897 2.03457 2.48886    |
| <b>1d</b>                    | <b>1e</b>                    | <b>1f</b>                    |
| S -1.52530 -0.93271 0.38033  | S -1.58354 -0.23084 0.06530  | S 0.43420 -0.28891 -1.47630  |
| C -2.09244 -0.89097 -1.27577 | C -0.50431 -0.79982 -1.20791 | C -0.02530 1.20082 -0.67106  |
| C -1.18712 -0.88796 -2.26344 | C 0.75329 -0.33624 -1.20420  | C -0.02530 1.20082 0.67106   |
| S 0.51220 -0.86037 -1.84672  | S 1.19841 0.79463 0.07350    | S 0.43420 -0.28891 1.47630   |
| C 0.27250 -0.56167 -0.03450  | C -0.20110 0.29655 1.13056   | C 0.11798 -1.30954 0.00000   |
| C 1.10532 -1.63862 0.71112   | H -0.90558 -1.45562 -1.96578 | Cl 1.19594 -2.72440 0.00000  |
| N 0.72418 0.76626 0.28555    | H 1.48813 -0.57325 -1.95872  | Cl -1.58913 -1.90376 0.00000 |
| C 0.84601 1.07962 1.71519    | H 0.10008 -0.52564 1.77704   | H -0.27130 2.05694 -1.28084  |
| C -0.06341 1.80964 -0.37442  | H -0.51717 1.14923 1.72577   | H -0.27130 2.05694 1.28084   |
| H -3.16023 -0.88496 -1.43835 |                              |                              |
| H -1.43831 -0.88074 -3.31399 |                              |                              |
| H 1.62500 0.48717 2.18104    |                              |                              |
| H -0.09529 0.93614 2.25926   |                              |                              |
| H 1.12853 2.12713 1.79094    |                              |                              |
| H -0.12994 1.61061 -1.43951  |                              |                              |
| H -1.07524 1.88577 0.04070   |                              |                              |
| H 0.44923 2.75868 -0.23141   |                              |                              |
| F 2.41465 -1.38657 0.59609   |                              |                              |
| F 0.87993 -2.86040 0.23538   |                              |                              |
| F 0.80973 -1.67603 2.02251   |                              |                              |



|           |          |          |          |           |          |          |          |           |          |          |          |
|-----------|----------|----------|----------|-----------|----------|----------|----------|-----------|----------|----------|----------|
| <b>1g</b> |          |          |          | <b>1h</b> |          |          |          | <b>1i</b> |          |          |          |
| S         | 0.43420  | -0.28891 | -1.47630 | S         | -5.88023 | 0.04670  | 0.43246  | S         | -5.96985 | -0.62557 | 0.53428  |
| C         | -0.02530 | 1.20082  | -0.67106 | C         | -6.46195 | -0.61263 | -1.08846 | C         | -6.50461 | -0.65139 | -1.10882 |
| C         | -0.02530 | 1.20082  | 0.67106  | C         | -5.61949 | -0.64043 | -2.13970 | C         | -5.59837 | -0.62912 | -2.10816 |
| S         | 0.43420  | -0.28891 | 1.47630  | S         | -3.99518 | 0.03756  | -1.92413 | S         | -3.90276 | -0.52993 | -1.71422 |
| C         | 0.11798  | -1.30954 | 0.00000  | C         | -4.05051 | 0.08871  | -0.04409 | C         | -4.17915 | -0.08364 | 0.10915  |
| Cl        | 1.19594  | -2.72440 | 0.00000  | N         | -3.37243 | -1.03224 | 0.56977  | N         | -3.29700 | -0.81294 | 0.97512  |
| Cl        | -1.58913 | -1.90376 | 0.00000  | C         | -1.92748 | -1.03360 | 0.30943  | C         | -1.88931 | -0.43248 | 0.78377  |
| H         | -0.27130 | 2.05694  | -1.28084 | C         | -3.91933 | -2.34292 | 0.23011  | C         | -3.41001 | -2.27274 | 0.92971  |
| H         | -0.27130 | 2.05694  | 1.28084  | N         | -3.42366 | 1.31029  | 0.40702  | N         | -3.99394 | 1.31959  | 0.28609  |
|           |          |          |          | C         | -3.41117 | 1.42310  | 1.87078  | C         | -4.11870 | 1.75669  | 1.68444  |
|           |          |          |          | C         | -3.95570 | 2.54939  | -0.16096 | C         | -4.80523 | 2.18362  | -0.57289 |
|           |          |          |          | N         | -7.80915 | -1.00276 | -1.12968 | N         | -7.96262 | -0.68154 | -1.29443 |
|           |          |          |          | N         | -6.02783 | -1.17050 | -3.39759 | N         | -5.94171 | -0.68532 | -3.51839 |
|           |          |          |          | H         | -1.70487 | -1.20624 | -0.75107 | O         | -8.48785 | -1.78702 | -1.31108 |
|           |          |          |          | H         | -1.48660 | -0.08904 | 0.60852  | O         | -8.52072 | 0.40585  | -1.36156 |
|           |          |          |          | H         | -1.48400 | -1.83972 | 0.89219  | O         | -4.99526 | -0.72640 | -4.30327 |
|           |          |          |          | H         | -3.78050 | -2.58625 | -0.83098 | O         | -7.13144 | -0.69940 | -3.82010 |
|           |          |          |          | H         | -3.39621 | -3.08809 | 0.82780  | H         | -1.50982 | -0.76550 | -0.19140 |
|           |          |          |          | H         | -4.97631 | -2.38614 | 0.47329  | H         | -1.76970 | 0.64234  | 0.85527  |
|           |          |          |          | H         | -3.00151 | 0.52443  | 2.31785  | H         | -1.30145 | -0.91616 | 1.56139  |
|           |          |          |          | H         | -4.41947 | 1.58869  | 2.27447  | H         | -3.11776 | -2.67998 | -0.04477 |
|           |          |          |          | H         | -2.79283 | 2.27816  | 2.13983  | H         | -2.74702 | -2.67524 | 1.69309  |
|           |          |          |          | H         | -3.89932 | 2.52998  | -1.24353 | H         | -4.42376 | -2.59028 | 1.14908  |
|           |          |          |          | H         | -4.99672 | 2.72680  | 0.13421  | H         | -3.49049 | 1.15344  | 2.32977  |
|           |          |          |          | H         | -3.34117 | 3.36901  | 0.20897  | H         | -5.15496 | 1.69163  | 2.03696  |
|           |          |          |          | H         | -7.98822 | -1.47593 | -2.00806 | H         | -3.80089 | 2.79608  | 1.73824  |
|           |          |          |          | H         | -8.05372 | -1.60317 | -0.35315 | H         | -4.62196 | 1.96101  | -1.61921 |
|           |          |          |          | H         | -5.33942 | -1.82371 | -3.75322 | H         | -5.87686 | 2.09119  | -0.36001 |
|           |          |          |          | H         | -6.12414 | -0.43547 | -4.08914 | H         | -4.50346 | 3.21202  | -0.38568 |

|           |          |          |          |           |          |          |          |           |          |          |          |
|-----------|----------|----------|----------|-----------|----------|----------|----------|-----------|----------|----------|----------|
| <b>1j</b> |          |          |          | <b>1k</b> |          |          |          | <b>1l</b> |          |          |          |
| N         | -0.00606 | 0.32153  | -1.27304 | S         | 0.50918  | -0.25519 | 1.14712  | S         | -1.47203 | -0.19795 | -0.69146 |
| C         | 1.37486  | 0.10874  | -1.31145 | C         | -0.34296 | -1.72929 | 1.59561  | C         | -2.02514 | 0.82459  | 0.58598  |
| C         | 1.90263  | -0.54010 | -0.26333 | C         | -1.43601 | -2.06689 | 0.88941  | C         | -1.11742 | 1.57099  | 1.23821  |
| S         | 0.68916  | -1.02979 | 0.91510  | S         | -1.94830 | -1.02720 | -0.42781 | S         | 0.57710  | 1.49482  | 0.83146  |
| C         | -0.70562 | -0.42195 | -0.21982 | C         | -0.85030 | 0.43611  | 0.03111  | C         | 0.39160  | 0.02666  | -0.35725 |
| N         | -1.46808 | -1.51226 | -0.79748 | N         | -0.22317 | 1.01932  | -1.13486 | N         | 1.04199  | 0.27548  | -1.61675 |
| C         | -2.21980 | -2.28122 | 0.19864  | C         | -1.20579 | 1.60679  | -2.05445 | C         | 2.49972  | 0.40100  | -1.47923 |
| C         | -0.66698 | -2.43393 | -1.60345 | C         | 0.66518  | 0.13456  | -1.88967 | C         | 0.53382  | 1.41957  | -2.37534 |
| N         | -1.61475 | 0.41314  | 0.55866  | N         | -1.64019 | 1.45218  | 0.68600  | N         | 0.96590  | -1.13862 | 0.25761  |
| C         | -2.72889 | 0.90589  | -0.26254 | C         | -0.86456 | 2.64962  | 1.03081  | C         | 0.94855  | -2.32104 | -0.61457 |
| C         | -0.95535 | 1.56824  | 1.17157  | C         | -2.37631 | 0.99806  | 1.86195  | C         | 0.40894  | -1.49098 | 1.56305  |
| H         | -0.48572 | 0.27289  | -2.16084 | N         | 0.27661  | -2.48424 | 2.60849  | N         | -1.50620 | 2.48711  | 2.29974  |
| H         | 1.93284  | 0.51827  | -2.14043 | H         | -2.02687 | -2.94763 | 1.09898  | O         | -0.60402 | 3.16620  | 2.78990  |
| H         | 2.94911  | -0.72672 | -0.09317 | H         | -1.81919 | 0.83596  | -2.54061 | O         | -2.68853 | 2.52753  | 2.62576  |
| H         | -1.55023 | -2.81940 | 0.88224  | H         | -1.86101 | 2.28932  | -1.52514 | H         | -3.07747 | 0.85830  | 0.82555  |
| H         | -2.85711 | -1.62633 | 0.78193  | H         | -0.66393 | 2.14884  | -2.82795 | H         | 2.77744  | 1.31655  | -0.94002 |
| H         | -2.83358 | -3.01150 | -0.32708 | H         | 0.12853  | -0.71405 | -2.32967 | H         | 2.90905  | -0.45193 | -0.95016 |
| H         | 0.05145  | -2.99663 | -0.99551 | H         | 1.11008  | 0.72393  | -2.69019 | H         | 2.93019  | 0.44990  | -2.47784 |
| H         | -1.34575 | -3.13653 | -2.08452 | H         | 1.45793  | -0.24695 | -1.25557 | H         | 0.71633  | 2.36999  | -1.86022 |
| H         | -0.12179 | -1.90370 | -2.37904 | H         | -0.34800 | 3.03101  | 0.15689  | H         | 1.04978  | 1.43409  | -3.33377 |
| H         | -3.26614 | 0.08069  | -0.71780 | H         | -0.12533 | 2.44527  | 1.81580  | H         | -0.53107 | 1.31842  | -2.55596 |
| H         | -2.38761 | 1.58573  | -1.05496 | H         | -1.55869 | 3.40396  | 1.39851  | H         | 1.40365  | -2.09554 | -1.57234 |
| H         | -3.40720 | 1.45846  | 0.38595  | H         | -3.01530 | 0.15925  | 1.60571  | H         | -0.07197 | -2.68546 | -0.78592 |
| H         | -0.16451 | 1.24398  | 1.83978  | H         | -1.70650 | 0.70760  | 2.68193  | H         | 1.51573  | -3.10824 | -0.12098 |
| H         | -0.53069 | 2.24641  | 0.42143  | H         | -3.00215 | 1.82145  | 2.20309  | H         | 0.49142  | -0.65457 | 2.24973  |
| H         | -1.70264 | 2.10856  | 1.75098  | H         | -0.28542 | -3.28306 | 2.86973  | H         | -0.64050 | -1.80278 | 1.49298  |
|           |          |          |          | H         | 0.47215  | -1.92713 | 3.42983  | H         | 0.99080  | -2.32051 | 1.96048  |
| <b>1m</b> |          |          |          | <b>2a</b> |          |          |          | <b>2b</b> |          |          |          |
| S         | 0.93491  | 0.75944  | -1.11818 | N         | 0.70906  | -0.32661 | 1.23119  | N         | -0.87290 | -0.85880 | 0.82386  |
| C         | 2.20522  | 0.33660  | 0.00964  | C         | 1.66108  | -1.35291 | 1.20844  | C         | -2.22991 | -0.98637 | 0.51409  |
| C         | 1.86615  | -0.39332 | 1.07645  | C         | 2.04071  | -1.77938 | -0.00427 | C         | -2.59650 | -0.58779 | -0.71263 |
| S         | 0.20579  | -0.86483 | 1.36448  | S         | 1.19616  | -0.93141 | -1.30117 | S         | -1.25423 | 0.06930  | -1.64406 |
| F         | 2.74894  | -0.79680 | 2.00282  | C         | 0.01459  | -0.13780 | -0.04748 | C         | -0.10131 | -0.07015 | -0.14264 |
| H         | 3.21560  | 0.66274  | -0.18325 | N         | -1.30509 | -0.73971 | 0.01495  | N         | 1.13347  | -0.72813 | -0.55773 |
| C         | -0.51330 | 0.22319  | -0.01615 | C         | -1.29223 | -2.18353 | 0.25642  | N         | 0.23695  | 1.22268  | 0.42124  |
| N         | -1.44922 | -0.50874 | -0.82825 | C         | -2.14304 | -0.45243 | -1.14935 | C         | 0.91521  | -2.06172 | -1.12221 |
| C         | -2.64341 | -0.91932 | -0.07882 | C         | -0.07836 | 1.35129  | -0.37490 | C         | 2.07789  | -0.85453 | 0.56056  |
| C         | -0.90807 | -1.67057 | -1.53474 | H         | 0.05119  | -0.36402 | 1.99880  | C         | -0.92148 | 1.99315  | 0.87427  |
| N         | -1.18675 | 1.34580  | 0.58934  | H         | 2.05888  | -1.70187 | 2.14977  | C         | 1.03761  | 2.05405  | -0.48233 |
| C         | -1.84814 | 2.21189  | -0.39652 | H         | 2.79611  | -2.51637 | -0.21528 | H         | -0.65904 | -0.61103 | 1.77963  |
| C         | -0.34847 | 2.16804  | 1.46086  | H         | -0.70433 | -2.41842 | 1.13888  | H         | -2.88157 | -1.43933 | 1.24649  |
| H         | -2.40561 | -1.68907 | 0.66817  | H         | -0.88100 | -2.74197 | -0.59277 | H         | -3.57909 | -0.67881 | -1.14289 |
| H         | -3.08903 | -0.07072 | 0.42714  | H         | -2.31672 | -2.50925 | 0.43027  | H         | 1.88351  | -2.45575 | -1.42754 |
| H         | -3.35833 | -1.33938 | -0.78428 | H         | -1.69102 | -0.80743 | -2.08572 | H         | 0.27206  | -2.00469 | -1.99409 |
| H         | -0.59586 | -2.46274 | -0.84386 | H         | -2.34367 | 0.61150  | -1.23121 | H         | 0.46684  | -2.74898 | -0.39447 |
| H         | -1.69403 | -2.05791 | -2.18107 | H         | -3.09513 | -0.96340 | -1.01807 | H         | 2.29173  | 0.11596  | 0.99562  |
| H         | -0.05947 | -1.38554 | -2.14644 | H         | -0.35476 | 1.52536  | -1.41329 | H         | 3.00153  | -1.28379 | 0.17506  |
| H         | -2.51530 | 1.63378  | -1.02610 | H         | 0.89470  | 1.79849  | -0.19742 | H         | 1.69749  | -1.51905 | 1.34814  |
| H         | -1.12223 | 2.73048  | -1.03470 | H         | -0.81753 | 1.82154  | 0.27641  | H         | -1.52161 | 1.42176  | 1.57661  |
| H         | -2.42314 | 2.95828  | 0.14909  |           |          |          |          | H         | -1.56255 | 2.30364  | 0.04061  |
| H         | 0.08720  | 1.56337  | 2.24971  |           |          |          |          | H         | -0.55474 | 2.88227  | 1.38493  |
| H         | 0.45121  | 2.67307  | 0.90539  |           |          |          |          | H         | 1.92758  | 1.52215  | -0.79902 |
| H         | -0.98507 | 2.92347  | 1.91818  |           |          |          |          | H         | 1.32583  | 2.95817  | 0.05238  |
|           |          |          |          |           |          |          |          | H         | 0.46725  | 2.34579  | -1.37387 |

| <b>2c</b> |          |          |          | <b>3a</b> |          |          |          | <b>3b</b> |          |          |          |
|-----------|----------|----------|----------|-----------|----------|----------|----------|-----------|----------|----------|----------|
| N         | -0.61285 | -0.59159 | 0.53197  | O         | -5.20261 | -0.57712 | -0.64651 | O         | 0.02403  | -0.56294 | 0.31212  |
| C         | -1.81120 | -1.20273 | 0.21107  | C         | -5.57944 | -0.69739 | -1.95358 | C         | -1.33787 | -0.67350 | 0.43921  |
| C         | -2.29174 | -0.96973 | -1.02262 | C         | -4.72335 | -0.30186 | -2.90034 | C         | -2.08100 | -0.26514 | -0.59648 |
| S         | -1.20278 | 0.04419  | -1.96266 | S         | -3.21122 | 0.28960  | -2.23443 | S         | -1.12550 | 0.31657  | -1.94959 |
| C         | 0.11938  | -0.00762 | -0.59062 | C         | -3.85706 | -0.07715 | -0.47642 | C         | 0.46224  | -0.06302 | -0.96786 |
| N         | 1.24987  | -0.77832 | -1.09211 | N         | -3.00900 | -1.05152 | 0.15413  | N         | 1.24549  | -1.04123 | -1.67463 |
| N         | 0.58654  | 1.31458  | -0.23261 | N         | -3.93990 | 1.10099  | 0.33608  | N         | 1.25133  | 1.10987  | -0.72078 |
| C         | 0.92777  | -2.16505 | -1.40292 | H         | -6.56573 | -1.11158 | -2.08974 | C         | -1.77363 | -1.24043 | 1.74551  |
| C         | 2.50567  | -0.71196 | -0.33816 | C         | -2.93958 | -2.32040 | -0.57225 | C         | 0.53719  | -2.30325 | -1.89230 |
| C         | -0.43481 | 2.15381  | 0.39229  | C         | -3.39559 | -1.31871 | 1.54823  | C         | 2.52863  | -1.32122 | -1.01212 |
| C         | 1.17884  | 2.03152  | -1.36463 | H         | -2.18993 | -2.94547 | -0.09004 | C         | 0.59261  | 2.09044  | 0.13891  |
| C         | 0.09502  | -0.93434 | 1.75067  | H         | -2.63770 | -2.14892 | -1.60075 | C         | 1.71674  | 1.74453  | -1.95378 |
| H         | -2.29586 | -1.79759 | 0.97196  | H         | -3.89729 | -2.85439 | -0.56182 | H         | -3.15673 | -0.29159 | -0.63337 |
| H         | -3.21988 | -1.33192 | -1.42822 | H         | -3.37249 | -0.40599 | 2.13275  | H         | -2.85905 | -1.30094 | 1.78427  |
| H         | 1.77557  | -2.60469 | -1.92832 | H         | -2.67777 | -2.02631 | 1.96052  | H         | -1.42421 | -0.61616 | 2.56892  |
| H         | 0.05654  | -2.21361 | -2.04961 | H         | -4.39802 | -1.75550 | 1.61913  | H         | -1.35790 | -2.23910 | 1.88526  |
| H         | 0.73468  | -2.76711 | -0.50452 | C         | -4.91465 | 2.07942  | -0.14088 | H         | 1.15696  | -2.93423 | -2.52721 |
| H         | 2.68449  | 0.29730  | 0.01598  | C         | -2.63819 | 1.73593  | 0.54141  | H         | -0.40627 | -2.12227 | -2.39775 |
| H         | 3.31652  | -1.00352 | -1.00752 | H         | -5.90007 | 1.62879  | -0.19575 | H         | 0.34626  | -2.83638 | -0.95273 |
| H         | 2.52507  | -1.39116 | 0.52224  | H         | -4.64594 | 2.48651  | -1.12374 | H         | 3.11203  | -0.41309 | -0.91073 |
| H         | -0.81565 | 1.68581  | 1.29477  | H         | -4.94558 | 2.89618  | 0.57831  | H         | 3.07425  | -2.03007 | -1.63334 |
| H         | -1.27701 | 2.34948  | -0.28253 | H         | -1.91868 | 1.00644  | 0.89935  | H         | 2.38957  | -1.76149 | -0.01823 |
| H         | 0.03197  | 3.10164  | 0.65775  | H         | -2.75344 | 2.52353  | 1.28449  | H         | 0.33931  | 1.63972  | 1.09307  |
| H         | 1.91309  | 1.40908  | -1.86507 | H         | -2.25378 | 2.18656  | -0.38349 | H         | -0.31483 | 2.50165  | -0.32101 |
| H         | 1.66385  | 2.93288  | -0.99166 | H         | -4.90419 | -0.34275 | -3.96064 | H         | 1.29442  | 2.90404  | 0.31498  |
| H         | 0.41508  | 2.32760  | -2.09600 |           |          |          |          | H         | 2.20881  | 1.01344  | -2.58738 |
| H         | 0.84754  | -0.17359 | 1.94716  |           |          |          |          | H         | 2.42510  | 2.52865  | -1.69057 |
| H         | 0.58477  | -1.91206 | 1.70748  |           |          |          |          | H         | 0.89000  | 2.19932  | -2.51590 |
| H         | -0.61145 | -0.93877 | 2.58120  |           |          |          |          |           |          |          |          |

|           |                             |           |                              |           |                              |
|-----------|-----------------------------|-----------|------------------------------|-----------|------------------------------|
| <b>4a</b> | N -1.16101 0.02840 -0.39182 | <b>4b</b> | N -1.44718 -0.09238 -0.12969 | <b>4c</b> | N 0.65340 -0.53398 0.98208   |
|           | N -1.77670 -1.03463 0.28069 |           | N -1.91742 -1.34722 0.24446  |           | N 1.01237 -1.81732 0.60765   |
|           | C -0.96572 -1.54352 1.13684 |           | C -1.05286 -1.96174 0.97096  |           | C 0.23725 -2.26294 -0.31875  |
|           | S 0.59753 -0.74794 1.32253  |           | S 0.48828 -1.16410 1.23871   |           | S -0.94921 -1.16299 -0.98859 |
|           | C -0.13210 0.69603 0.43448  |           | C 0.01713 0.07133 -0.10926   |           | C -0.14507 0.23611 0.01023   |
|           | C 0.89633 1.36942 -0.46281  |           | N 0.58485 -0.18694 -1.41199  |           | N -1.10809 1.03894 0.71537   |
|           | C -0.74216 1.67496 1.43794  |           | C 0.30676 -1.52145 -1.94453  |           | C -1.86831 0.32616 1.74083   |
|           | H -1.88735 0.67814 -0.67250 |           | C 2.01622 0.09728 -1.51070   |           | C -2.02525 1.74287 -0.18168  |
|           | H -1.22037 -2.43231 1.69184 |           | C 0.36395 1.47615 0.37955    |           | N 0.61835 1.10012 -0.88239   |
|           | H 1.69436 1.81613 0.13021   |           | H -1.82702 0.15048 -1.03672  |           | C 1.66331 0.40200 -1.62930   |
|           | H 0.41366 2.16684 -1.03128  |           | H -1.27401 -2.92548 1.40176  |           | C 1.21256 2.25209 -0.19361   |
|           | H 1.32035 0.64960 -1.15817  |           | H -0.75825 -1.73232 -1.90922 |           | H 1.46912 -0.03170 1.30569   |
|           | H 0.02604 2.08318 2.09443   |           | H 0.83673 -2.30780 -1.39345  |           | H 0.33220 -3.27629 -0.67617  |
|           | H -1.49351 1.17520 2.04830  |           | H 0.62827 -1.54693 -2.98437  |           | H -1.19529 -0.16100 2.43699  |
|           | H -1.21548 2.50169 0.90171  |           | H 2.60974 -0.50468 -0.80887  |           | H -2.53606 -0.42908 1.30760  |
|           |                             |           | H 2.21665 1.14979 -1.33482   |           | H -2.47058 1.05913 2.27575   |
|           |                             |           | H 2.34243 -0.14154 -2.52114  |           | H -2.71229 1.04576 -0.68215  |
|           |                             |           | H 1.41284 1.56798 0.65403    |           | H -1.47179 2.28749 -0.93918  |
|           |                             |           | H -0.24486 1.69452 1.25111   |           | H -2.61852 2.44160 0.40632   |
|           |                             |           | H 0.14035 2.19651 -0.40890   |           | H 2.12800 1.11655 -2.30665   |
|           |                             |           |                              |           | H 1.23413 -0.40135 -2.21973  |
|           |                             |           |                              |           | H 2.44540 -0.01313 -0.97888  |
|           |                             |           |                              |           | H 2.00316 1.96395 0.51522    |
|           |                             |           |                              |           | H 0.45483 2.80850 0.34601    |
|           |                             |           |                              |           | H 1.66733 2.89519 -0.94564   |
| <b>4d</b> | N -1.43863 0.21272 0.34859  | <b>4e</b> | N 0.56381 0.78499 0.50164    | <b>4f</b> | N -0.98991 -0.11429 -0.07967 |
|           | N -2.40266 -0.74933 0.64796 |           | N 1.35029 -0.14013 1.18990   |           | N -1.29453 -1.38385 0.37258  |
|           | C -2.07607 -1.43894 1.67520 |           | C 1.07820 -1.33819 0.81232   |           | C -0.26574 -1.94833 0.90384  |
|           | S -0.62384 -0.98907 2.55695 |           | S -0.22229 -1.51704 -0.36074 |           | S 1.23807 -1.04364 0.87051   |
|           | C -0.36259 0.37923 1.33548  |           | C -0.73048 0.20521 0.07276   |           | C 0.43219 0.13634 -0.36278   |
|           | N 0.92216 0.22186 0.69171   |           | C -1.77997 0.15772 1.18736   |           | N 0.75845 -0.11713 -1.74683  |
|           | C -0.56811 1.72869 2.07269  |           | C -1.25636 0.92593 -1.16212  |           | C 0.47303 -1.47838 -2.19826  |
|           | F 0.29995 1.90341 3.07435   |           | C 0.49281 2.04372 1.23715    |           | C 2.12024 0.25633 -2.12436   |
|           | F -1.80169 1.83210 2.57998  |           | H 1.64893 -2.18180 1.16635   |           | C 0.79774 1.56685 0.03574    |
|           | F -0.40963 2.75268 1.21118  |           | H -2.64505 -0.41238 0.85021  |           | C -1.96699 0.41720 -1.02054  |
|           | C 2.09904 0.27957 1.55124   |           | H -2.11184 1.16414 1.44758   |           | H -0.33816 -2.92132 1.36245  |
|           | C 1.13003 0.96440 -0.55034  |           | H -1.37467 -0.32249 2.07775  |           | H -0.54325 -1.75974 -1.94006 |
|           | H -1.90871 1.07383 0.10282  |           | H -2.14207 0.42147 -1.54862  |           | H 1.15742 -2.21468 -1.75947  |
|           | H -2.67470 -2.27513 2.00076 |           | H -0.49216 0.95473 -1.93499  |           | H 0.57681 -1.50772 -3.28221  |
|           | H 1.93357 -0.30200 2.45629  |           | H -1.54335 1.94649 -0.90486  |           | H 2.87871 -0.28310 -1.53985  |
|           | H 2.38465 1.29778 1.83734   |           | H 1.50844 2.40272 1.37842    |           | H 2.27796 1.32478 -2.01070   |
|           | H 2.93135 -0.16937 1.01013  |           | H 0.01604 1.94499 2.21653    |           | H 2.26269 0.00673 -3.17429   |
|           | H 1.35550 2.02459 -0.39143  |           | H -0.05443 2.77235 0.64206   |           | H 1.87395 1.69780 0.12771    |

| 4g |          |          |          | 4h |          |          |          | 5a |          |         |          |
|----|----------|----------|----------|----|----------|----------|----------|----|----------|---------|----------|
| N  | 1.05465  | 0.31695  | -0.10776 | N  | -1.43863 | 0.21272  | 0.34859  | S  | -2.25064 | 2.22954 | -1.31828 |
| N  | 1.87489  | -0.19658 | 0.86243  | N  | -2.40266 | -0.74933 | 0.64796  | C  | -2.83209 | 3.60815 | -0.26686 |
| C  | 1.20012  | -0.80182 | 1.78176  | C  | -2.07607 | -1.43894 | 1.67520  | N  | -1.52272 | 4.09498 | 0.21039  |
| S  | -0.52812 | -0.92527 | 1.54641  | S  | -0.62384 | -0.98907 | 2.55695  | N  | -0.50785 | 3.91604 | -0.69000 |
| C  | -0.29169 | -0.27275 | -0.22452 | C  | -0.36259 | 0.37923  | 1.33548  | N  | -0.67899 | 2.99529 | -1.52639 |
| N  | -1.23542 | 0.76231  | -0.56293 | N  | 0.92216  | 0.22186  | 0.69171  | C  | -1.45154 | 5.37757 | 0.90012  |
| C  | -1.09152 | 1.99710  | 0.20718  | C  | -0.56811 | 1.72869  | 2.07269  | H  | -2.11285 | 5.35036 | 1.76335  |
| C  | -2.62500 | 0.30409  | -0.49678 | F  | 0.29995  | 1.90341  | 3.07435  | H  | -1.72649 | 6.21865 | 0.25995  |
| N  | -0.45692 | -1.38073 | -1.14682 | F  | -1.80169 | 1.83210  | 2.57998  | H  | -0.43098 | 5.51300 | 1.24518  |
| C  | 0.48306  | -2.48016 | -0.96315 | F  | -0.40963 | 2.75268  | 1.21118  | C  | -3.58327 | 4.65087 | -1.09917 |
| C  | -0.60422 | -1.06949 | -2.57284 | C  | 2.09904  | 0.27957  | 1.55124  | H  | -4.46330 | 4.19082 | -1.54786 |
| C  | 1.74614  | 0.70199  | -1.32714 | C  | 1.13003  | 0.96440  | -0.55034 | H  | -2.94829 | 5.03079 | -1.89925 |
| H  | 1.69132  | -1.21438 | 2.64834  | H  | -1.90871 | 1.07383  | 0.10282  | H  | -3.91236 | 5.48539 | -0.47741 |
| H  | -0.09384 | 2.40678  | 0.09162  | H  | -2.67470 | -2.27513 | 2.00076  | C  | -3.67524 | 3.09828 | 0.89720  |
| H  | -1.28252 | 1.84149  | 1.27597  | H  | 1.93357  | -0.30200 | 2.45629  | H  | -3.11299 | 2.37702 | 1.48532  |
| H  | -1.81762 | 2.71131  | -0.17912 | H  | 2.38465  | 1.29778  | 1.83734  | H  | -4.58517 | 2.62682 | 0.52663  |
| H  | -3.26624 | 1.06364  | -0.94199 | H  | 2.93135  | -0.16937 | 1.01013  | H  | -3.97394 | 3.93031 | 1.53707  |
| H  | -2.94479 | 0.14881  | 0.54286  | H  | 1.35550  | 2.02459  | -0.39143 |    |          |         |          |
| H  | -2.74400 | -0.62869 | -1.03754 | H  | 0.25456  | 0.86914  | -1.18496 |    |          |         |          |
| H  | 0.18003  | -3.29690 | -1.61775 | H  | 1.97475  | 0.50961  | -1.06679 |    |          |         |          |
| H  | 0.45530  | -2.83667 | 0.06229  |    |          |          |          |    |          |         |          |
| H  | 1.51632  | -2.20745 | -1.21212 |    |          |          |          |    |          |         |          |
| H  | 0.35794  | -0.94820 | -3.08230 |    |          |          |          |    |          |         |          |
| H  | -1.18012 | -0.16047 | -2.70520 |    |          |          |          |    |          |         |          |
| H  | -1.13100 | -1.89837 | -3.04819 |    |          |          |          |    |          |         |          |
| H  | 1.04277  | 1.23251  | -1.96583 |    |          |          |          |    |          |         |          |
| H  | 2.16188  | -0.14714 | -1.87540 |    |          |          |          |    |          |         |          |
| H  | 2.55845  | 1.37221  | -1.05513 |    |          |          |          |    |          |         |          |

|                                                                                                                                                                                                                                                                                                                                                                                                                                                                                                                                                                                                                                                                                                                                                                                                              |                                                                                                                                                                                                                                                                                                                                                                                                                                                                                                                                                                                                                                                                                                                                                                                                                                                                   |                                                                                                                                                                                                                                                                                                                                                                                                                                                                                                                                                                                                                                                                                                                                                                                  |
|--------------------------------------------------------------------------------------------------------------------------------------------------------------------------------------------------------------------------------------------------------------------------------------------------------------------------------------------------------------------------------------------------------------------------------------------------------------------------------------------------------------------------------------------------------------------------------------------------------------------------------------------------------------------------------------------------------------------------------------------------------------------------------------------------------------|-------------------------------------------------------------------------------------------------------------------------------------------------------------------------------------------------------------------------------------------------------------------------------------------------------------------------------------------------------------------------------------------------------------------------------------------------------------------------------------------------------------------------------------------------------------------------------------------------------------------------------------------------------------------------------------------------------------------------------------------------------------------------------------------------------------------------------------------------------------------|----------------------------------------------------------------------------------------------------------------------------------------------------------------------------------------------------------------------------------------------------------------------------------------------------------------------------------------------------------------------------------------------------------------------------------------------------------------------------------------------------------------------------------------------------------------------------------------------------------------------------------------------------------------------------------------------------------------------------------------------------------------------------------|
| <b>5b</b><br>S -2.08261 2.47782 -1.69529<br>C -2.78026 3.73410 -0.51949<br>N -1.52036 4.37497 -0.13053<br>N -0.40151 3.61136 -0.22769<br>N -0.48561 2.60826 -0.98635<br>C -1.50931 5.36575 0.93681<br>H -1.81543 4.94940 1.89707<br>H -2.18599 6.17571 0.67336<br>H -0.49856 5.75628 1.00810<br>C -3.66657 4.72192 -1.27986<br>H -4.44636 4.21057 -1.83999<br>H -3.04803 5.27584 -1.98027<br>H -4.14008 5.41049 -0.57907<br>N -3.46129 3.20764 0.64747<br>C -2.66962 2.23863 1.40695<br>C -4.78014 2.64863 0.35277<br>H -1.70149 2.65852 1.66740<br>H -2.50469 1.30621 0.85454<br>H -3.20274 2.01115 2.32856<br>H -5.45205 3.41441 -0.02385<br>H -5.20077 2.26013 1.27827<br>H -4.73207 1.82428 -0.37247                                                                                                     | <b>5c</b><br>S -2.16553 2.26622 -1.55838<br>C -2.73293 3.62031 -0.40381<br>N -1.40796 4.06570 0.05339<br>N -0.33605 3.73443 -0.69024<br>N -0.51626 2.81672 -1.54500<br>C -1.25622 5.23503 0.90432<br>H -2.05413 5.22166 1.64325<br>H -1.30019 6.16876 0.34159<br>H -0.29447 5.16714 1.40631<br>N -3.51102 4.60178 -1.13705<br>N -3.50278 3.14814 0.72724<br>C -2.76823 2.25589 1.62381<br>C -4.74859 2.49883 0.30825<br>H -1.88296 2.74666 2.01690<br>H -2.45950 1.32828 1.12750<br>H -3.42812 2.00859 2.45397<br>H -5.29395 3.13541 -0.38063<br>H -5.36048 2.31423 1.18999<br>H -4.55295 1.53626 -0.18416<br>C -2.78798 5.23070 -2.23751<br>C -4.22568 5.61767 -0.35680<br>H -4.67012 5.17576 0.52780<br>H -5.01563 6.03033 -0.98511<br>H -3.58030 6.44676 -0.04469<br>H -2.35052 4.47741 -2.88641<br>H -1.99094 5.90233 -1.89144<br>H -3.49626 5.81761 -2.82063 | <b>6a</b><br>N 0.56911 -0.48094 1.28056<br>C 1.85410 -1.03887 1.30167<br>C 2.31062 -1.50627 0.13112<br>S 1.18317 -1.22368 -1.19737<br>C 0.16345 -0.06948 -0.06842<br>N -1.26298 -0.21608 -0.19597<br>C -1.75065 -1.56498 0.09504<br>C -1.78650 0.23570 -1.48208<br>C 0.61664 1.36167 -0.35619<br>H 0.41897 0.26285 1.95018<br>H 2.35897 -1.12973 2.25160<br>H 3.22477 -2.05390 -0.02139<br>H -1.34934 -1.90056 1.04526<br>H -1.46250 -2.28449 -0.68097<br>H -2.83741 -1.52703 0.15750<br>H -1.35391 -0.31722 -2.32875<br>H -1.60861 1.29739 -1.62645<br>H -2.86271 0.07306 -1.48943<br>H 0.51065 1.62174 -1.40652<br>H 1.67170 1.44234 -0.09763<br>H 0.03566 2.05932 0.25236                                                                                                     |
| <b>6a'</b><br>N -0.53672 0.97641 -0.43896<br>C 0.29742 1.96072 0.09391<br>C 1.26743 1.54752 0.92512<br>S 1.30090 -0.19759 1.13308<br>C -0.03204 -0.36856 -0.33528<br>N 0.56146 -0.91154 -1.52442<br>N -1.03423 -1.34207 -0.03448<br>C 1.80302 -0.34404 -2.01771<br>C 0.38421 -2.30445 -1.46174<br>C -1.71773 -1.28068 1.24310<br>C -0.58114 -2.56498 -0.55857<br>C -1.32844 1.27549 -1.62474<br>H 0.07790 2.98860 -0.15419<br>H 1.94780 2.19058 1.45722<br>H 2.00216 -0.75162 -3.00762<br>H 2.64467 -0.55685 -1.35456<br>H 1.69275 0.73541 -2.10289<br>H 0.89220 -2.96803 -2.13941<br>H -1.06209 -1.55107 2.07489<br>H -2.57204 -1.95500 1.21310<br>H -2.07413 -0.26487 1.39772<br>H -1.06674 -3.49385 -0.31647<br>H -0.72254 1.37125 -2.53070<br>H -1.86760 2.20665 -1.45620<br>H -2.04827 0.47399 -1.77267 | <b>6b</b><br>N -1.37091 -0.05411 -0.17220<br>N -2.25860 -1.07475 0.16813<br>C -1.90268 -1.66043 1.26093<br>S -0.42032 -1.20491 2.05092<br>C -0.01563 -0.16309 0.31580<br>N 0.93309 -0.84292 -0.47975<br>C 0.74213 -2.23958 -0.82377<br>C 2.19217 -0.31167 -0.17034<br>N 0.61778 1.06328 0.59201<br>C 0.04247 1.98257 1.55300<br>C 1.99687 0.85407 0.48303<br>H -1.38847 0.08522 -1.17435<br>H -2.53630 -2.43643 1.66502<br>H -0.26100 -2.37517 -1.22260<br>H 0.86781 -2.88822 0.04583<br>H 1.46293 -2.51045 -1.59241<br>H 3.10019 -0.76131 -0.53058<br>H 0.55767 2.93753 1.47270<br>H -1.00905 2.11997 1.31668<br>H 0.12733 1.59854 2.57287<br>H 2.70533 1.60239 0.79022                                                                                                                                                                                          | <b>6b'</b><br>N 0.95732 -0.12749 -0.08582<br>N 1.79258 -1.11920 -0.58346<br>C 1.45275 -1.47607 -1.77697<br>S 0.03569 -0.78223 -2.51138<br>C -0.37521 -0.06513 -0.64126<br>N -1.40135 -0.82111 -0.02068<br>C -1.31753 -2.26849 0.03756<br>C -2.61039 -0.15485 -0.25742<br>N -0.92524 1.23433 -0.68788<br>C -0.26433 2.27258 -1.45334<br>C -2.31971 1.09841 -0.66584<br>C 1.02886 -0.01235 1.36770<br>H 2.05917 -2.20093 -2.29959<br>H -0.33683 -2.55485 0.41095<br>H -1.46576 -2.72186 -0.94498<br>H -2.07496 -2.63348 0.72878<br>H -3.55894 -0.60496 -0.02368<br>H 0.78737 2.29112 -1.18034<br>H -0.71799 3.23025 -1.20566<br>H -0.34441 2.09082 -2.52848<br>H -2.96908 1.93705 -0.84307<br>H 0.45362 0.86047 1.66845<br>H 2.07228 0.12543 1.63789<br>H 0.63629 -0.89219 1.88452 |

|           |          |          |          |           |          |          |          |           |          |          |          |
|-----------|----------|----------|----------|-----------|----------|----------|----------|-----------|----------|----------|----------|
| <b>6c</b> |          |          |          | <b>6d</b> |          |          |          | <b>6e</b> |          |          |          |
| N         | -0.05721 | 1.76186  | 0.72236  | O         | -0.84136 | 1.09654  | -0.08978 | S         | -1.33481 | 1.48539  | 0.00000  |
| N         | 0.83999  | 2.68799  | 0.30291  | C         | -0.06705 | 2.00856  | 0.58982  | C         | -0.08603 | 2.75552  | 0.00000  |
| N         | 1.96921  | 2.24549  | -0.05379 | C         | 0.87411  | 1.56129  | 1.42454  | C         | 1.23305  | 2.47700  | 0.00000  |
| S         | 2.06556  | 0.51155  | 0.03227  | S         | 0.97044  | -0.18317 | 1.51947  | S         | 1.89676  | 0.86541  | 0.00000  |
| C         | 0.18515  | 0.37354  | 0.39029  | C         | -0.55514 | -0.25700 | 0.17548  | C         | -0.33967 | -0.03594 | 0.00000  |
| N         | -0.59514 | -0.13448 | -0.70652 | N         | -0.18923 | -0.99367 | -0.97094 | N         | -0.41338 | -0.88409 | -1.10349 |
| N         | -0.16109 | -0.53057 | 1.45164  | N         | -1.65330 | -0.97807 | 0.69034  | N         | -0.41338 | -0.88409 | 1.10349  |
| C         | -0.31213 | 0.34775  | -2.04740 | C         | 1.03770  | -0.67722 | -1.67348 | C         | -0.21708 | -0.40206 | -2.46026 |
| C         | -0.78662 | -1.50752 | -0.46073 | C         | -0.62025 | -2.31189 | -0.76190 | C         | -0.17173 | -2.18775 | -0.68019 |
| C         | 0.63413  | -0.52851 | 2.66576  | C         | -2.19318 | -0.64263 | 1.99229  | C         | -0.21708 | -0.40206 | 2.46026  |
| C         | -0.52327 | -1.74577 | 0.83711  | C         | -1.51242 | -2.30238 | 0.25047  | C         | -0.17173 | -2.18775 | 0.68019  |
| C         | -1.43387 | 2.22067  | 0.84597  | H         | -0.32001 | 3.03020  | 0.36005  | H         | -0.50036 | 3.76319  | 0.00000  |
| H         | -1.12777 | 0.04938  | -2.70371 | H         | 1.52418  | 2.20340  | 1.99561  | H         | 1.94326  | 3.30863  | 0.00000  |
| H         | 0.63241  | -0.03545 | -2.44023 | H         | 1.03506  | -1.19776 | -2.62902 | H         | -0.44340 | -1.21254 | -3.16300 |
| H         | -0.26539 | 1.43592  | -2.03092 | H         | 1.92221  | -0.96019 | -1.09834 | H         | 0.82320  | -0.05897 | -2.58500 |
| H         | -1.19424 | -2.16079 | -1.21215 | H         | 1.06618  | 0.39360  | -1.86327 | H         | -0.89535 | 0.44070  | -2.64385 |
| H         | 1.64113  | -0.92387 | 2.50585  | H         | -0.33078 | -3.10972 | -1.42212 | H         | -0.08205 | -3.00760 | -1.38245 |
| H         | 0.12129  | -1.12984 | 3.41418  | H         | -1.51391 | -0.92281 | 2.80056  | H         | 0.82320  | -0.05897 | 2.58500  |
| H         | 0.71633  | 0.49225  | 3.03246  | H         | -3.14601 | -1.15350 | 2.11540  | H         | -0.44340 | -1.21254 | 3.16300  |
| H         | -0.66860 | -2.64057 | 1.41626  | H         | -2.36852 | 0.43028  | 2.03272  | H         | -0.89535 | 0.44070  | 2.64385  |
| H         | -1.93790 | 2.27200  | -0.12028 | H         | -2.13833 | -3.09048 | 0.62909  | H         | -0.08205 | -3.00760 | 1.38245  |
| H         | -1.41708 | 3.20456  | 1.30530  |           |          |          |          |           |          |          |          |
| H         | -1.96463 | 1.52069  | 1.48633  |           |          |          |          |           |          |          |          |
| <b>7a</b> |          |          |          | <b>7b</b> |          |          |          | <b>7c</b> |          |          |          |
| N         | -1.15228 | 0.05398  | 0.26328  | N         | 0.35125  | -0.28207 | 0.02303  | F         | 1.03076  | 0.00000  | -0.26415 |
| C         | 0.00000  | 0.00000  | 0.96553  | C         | -0.71498 | -1.02782 | 0.03836  | C         | 0.00000  | 0.00000  | 0.52836  |
| C         | -1.41021 | -0.37802 | -1.11206 | C         | -2.01216 | -0.23895 | -0.03391 | F         | -1.03076 | 0.00000  | -0.26415 |
| C         | -2.36949 | 0.25122  | 1.03939  | F         | -3.06052 | -1.06410 | -0.01182 |           |          |          |          |
| N         | 1.15228  | -0.05398 | 0.26328  | C         | 1.65459  | -0.95756 | 0.08983  |           |          |          |          |
| C         | 2.36949  | -0.25122 | 1.03939  | F         | -2.12357 | 0.49104  | -1.17040 |           |          |          |          |
| C         | 1.41021  | 0.37802  | -1.11206 | F         | -2.17243 | 0.61127  | 1.00936  |           |          |          |          |
| H         | -0.59959 | -1.00541 | -1.46778 | C         | 0.50115  | 1.18663  | -0.05207 |           |          |          |          |
| H         | -1.55493 | 0.45456  | -1.80372 | H         | 1.47433  | -2.02382 | 0.14470  |           |          |          |          |
| H         | -2.32263 | -0.97609 | -1.11464 | H         | 2.19437  | -0.61326 | 0.97164  |           |          |          |          |
| H         | -2.96005 | 1.06995  | 0.62174  | H         | 2.23446  | -0.71119 | -0.79928 |           |          |          |          |
| H         | -2.08448 | 0.49311  | 2.05697  | H         | 1.03958  | 1.52266  | 0.83257  |           |          |          |          |
| H         | -2.98561 | -0.65280 | 1.03405  | H         | 1.09060  | 1.42673  | -0.93542 |           |          |          |          |
| H         | 2.96005  | -1.06995 | 0.62174  | H         | -0.45666 | 1.68044  | -0.10658 |           |          |          |          |
| H         | 2.08448  | -0.49311 | 2.05697  |           |          |          |          |           |          |          |          |
| H         | 2.98561  | 0.65280  | 1.03405  |           |          |          |          |           |          |          |          |
| H         | 0.59959  | 1.00541  | -1.46778 |           |          |          |          |           |          |          |          |
| H         | 1.55493  | -0.45456 | -1.80372 |           |          |          |          |           |          |          |          |
| H         | 2.32263  | 0.97609  | -1.11464 |           |          |          |          |           |          |          |          |

|           |                              |                             |                             |                              |                              |                              |                              |                             |                             |                             |                             |                             |                             |                              |                              |                              |                             |                             |                            |                            |                            |                            |                             |                             |
|-----------|------------------------------|-----------------------------|-----------------------------|------------------------------|------------------------------|------------------------------|------------------------------|-----------------------------|-----------------------------|-----------------------------|-----------------------------|-----------------------------|-----------------------------|------------------------------|------------------------------|------------------------------|-----------------------------|-----------------------------|----------------------------|----------------------------|----------------------------|----------------------------|-----------------------------|-----------------------------|
| <b>7d</b> | C 0.00000 0.00000 0.98004    | N 0.00000 -1.05978 0.11471  | N 0.00000 1.05978 0.11471   | C 0.00000 -2.43955 0.56740   | C 0.00000 -0.68087 -1.21486  | C 0.00000 2.43955 0.56740    | C 0.00000 0.68087 -1.21486   | H 0.88805 -2.95929 0.20970  | H -0.88805 -2.95929 0.20970 | H 0.00000 -2.42361 1.65211  | H 0.00000 -1.38415 -2.02879 | H -0.88805 2.95929 0.20970  | H 0.88805 2.95929 0.20970   | H 0.00000 2.42361 1.65211    | H 0.00000 1.38415 -2.02879   |                              |                             |                             |                            |                            |                            |                            |                             |                             |
|           | C -0.13191 -1.13692 -0.04163 | N 0.87581 -0.28450 -0.41185 | C 2.26489 -0.49976 -0.20692 | C 0.37523 0.93988 -1.04327   | N -1.33093 -0.56996 -0.38792 | C -2.61357 -1.14406 -0.18047 | C -1.17195 0.73869 -1.02861  | H 2.41911 -1.49373 0.28998  | H 2.69475 0.30959 0.44453   | H 2.81029 -0.48926 -1.19002 | H 0.67436 1.84560 -0.45538  | H 0.76425 1.03863 -2.08932  | H -3.23759 -0.47861 0.47667 | H -2.49940 -2.14577 0.31169  | H -3.14743 -1.27289 -1.16153 | H -1.59254 0.73044 -2.06705  | H -1.68233 1.53986 -0.43451 |                             |                            |                            |                            |                            |                             |                             |
|           | N 1.26911 -0.26133 0.50685   | C 1.49057 -1.61218 0.21079  | C 0.65073 -2.17090 -0.67428 | S -0.55844 -1.02259 -1.23739 | C -0.03102 0.24780 0.05837   | N -0.89832 0.44574 1.20077   | C -1.61837 -0.71179 1.70271  | C -1.68085 1.65396 0.98056  | N -0.03795 1.54017 -0.59859 | C 1.17528 1.92932 -1.28817  | C -0.63984 2.51956 0.29330  | H 1.42907 -0.00438 1.47196  | H 2.33529 -2.10205 0.67147  | H 0.70957 -3.17368 -1.06099  | H -0.92992 -1.54757 1.81776  | H -2.43063 -1.02298 1.03743  | H -2.03291 -0.46775 2.68070 | H -2.54249 1.48567 0.32024  | H -2.02916 2.05756 1.93066 | H 0.96888 2.82541 -1.87326 | H 1.47268 1.13322 -1.96825 | H 2.00943 2.13191 -0.60638 | H 0.06809 2.92568 1.03040   | H -1.06700 3.34203 -0.27962 |
| <b>8b</b> | O 1.33982 -0.01858 0.83810   | C 1.64535 -1.31031 0.52988  | C 0.87610 -1.95086 -0.35711 | S -0.37859 -0.90065 -0.99353 | C 0.11513 0.46291 0.21244    | N -0.81115 0.78927 1.24507   | C -1.66180 -0.25069 1.78478  | C -1.40546 2.08534 0.96133  | N 0.28368 1.68249 -0.51716  | C 1.56020 1.87484 -1.17824  | C -0.22761 2.77837 0.29710  | H 2.50457 -1.69755 1.05385  | H 1.00321 -2.96878 -0.68170 | H -1.06488 -1.13741 1.99021  | H -2.47726 -0.52904 1.10800  | H -2.08623 0.10054 2.72507   | H -2.25837 2.02133 0.27156  | H -1.72734 2.56518 1.88505  | H 1.48225 2.73385 -1.84361 | H 1.78612 0.99494 -1.77879 | H 2.38105 2.04086 -0.47289 | H 0.49402 3.12035 1.05052  | H -0.51566 3.61649 -0.33586 |                             |
|           | S 0.95353 -0.13624 1.38265   | C 1.72828 -1.52599 0.66205  | C 1.04330 -2.22426 -0.25933 | S -0.53333 -1.65361 -0.75086 | C -0.48420 -0.00268 0.17074  | N -1.63392 0.34279 0.96162   | C -2.38170 -0.71389 1.61018  | C -2.38457 1.38432 0.27408  | N -0.41961 1.03739 -0.81149 | C 0.86215 1.32604 -1.41985  | C -1.24316 2.15243 -0.36910 | H 2.71766 -1.79721 0.99991  | H 1.42376 -3.11325 -0.74124 | H -1.69540 -1.36027 2.15334  | H -2.95158 -1.32718 0.90220  | H -3.07087 -0.26170 2.32301  | H -3.06365 0.98750 -0.49295 | H -2.95520 1.96965 0.99409  | H 0.70097 1.97275 -2.28174 | H 1.30877 0.39524 -1.76721 | H 1.55883 1.81415 -0.72956 | H -0.74067 2.79264 0.36905 | H -1.54761 2.75573 -1.22334 |                             |
|           | N -0.44112 -0.48179 1.11145  | N -0.10619 -1.82094 1.25285 | C 0.26241 -2.33154 0.12849  | S 0.19299 -1.29840 -1.27930  | C -0.73767 -0.00928 -0.25088 | N -2.15550 0.11948 -0.45411  | C -2.91288 -1.08665 -0.73722 | C -2.39489 1.27322 -1.30933 | N -0.21795 1.29184 -0.60922 | C 0.93999 1.77103 0.11950   | C -1.33026 2.21612 -0.77609 | H -1.20243 -0.25804 1.73976 | H 0.61003 -3.35164 0.07827  | H -2.66049 -1.85416 -0.00699 | H -2.71828 -1.48102 -1.74025 | H -3.97466 -0.86114 -0.64430 | H -2.22519 1.05372 -2.37223 | H -3.41158 1.64010 -1.17541 | H 1.31384 2.66490 -0.37942 | H 1.71961 1.01243 0.10003  | H 0.71918 2.01123 1.16552  | H -1.65890 2.66670 0.17104 | H -1.06323 3.00905 -1.47388 |                             |



|  |                              |  |
|--|------------------------------|--|
|  | <b>8e</b>                    |  |
|  | N -1.27734 0.26255 0.95021   |  |
|  | N -1.94131 -0.92510 0.72095  |  |
|  | C -1.11876 -1.90225 0.53567  |  |
|  | S 0.58304 -1.50810 0.55203   |  |
|  | C 0.12047 0.32855 0.49325    |  |
|  | N 0.26092 0.98830 -0.77488   |  |
|  | C -0.07558 0.24879 -1.97640  |  |
|  | C 1.51100 1.73130 -0.77436   |  |
|  | N 1.02486 1.05121 1.35415    |  |
|  | C 0.68821 1.17165 2.75704    |  |
|  | C 1.52470 2.22836 0.66181    |  |
|  | C -2.10575 1.43040 0.67678   |  |
|  | H -1.48203 -2.90964 0.40708  |  |
|  | H -1.04985 -0.22152 -1.85274 |  |
|  | H 0.65867 -0.52798 -2.21594  |  |
|  | H -0.13589 0.94858 -2.80986  |  |
|  | H 2.38269 1.09215 -0.97348   |  |
|  | H 1.47837 2.53215 -1.51233   |  |
|  | H 1.56020 1.55289 3.28855    |  |
|  | H 0.44165 0.19013 3.15553    |  |
|  | H -0.15832 1.84307 2.94503   |  |
|  | H 0.86986 3.10415 0.77180    |  |
|  | H 2.52155 2.48586 1.01936    |  |
|  | H -3.02017 1.32850 1.25617   |  |
|  | H -2.35384 1.54002 -0.38125  |  |
|  | H -1.57251 2.32094 1.00234   |  |
